# Supplementary material for: MicroRNAs in Sarcopenia: A Systematic Review
Source: Front Med (Lausanne). 2020 May 28;7:180. doi: 10.3389/fmed.2020.00180 (PMC7270169; doi:10.3389/fmed.2020.00180)
Supplement: Supplementary file 1 [file Table_1.xlsx]

## Sheet: Sheet1
	Supplemental Table 1. Full search results.
	Database	Query	No of records
	PubMed	"miRNA AND sarcopenia"	67
		"microRNA AND sarcopenia"	73
		"miRNA AND frail"	29
		"microRNA AND frail"	29
		"miRNA AND frailty"	28
		"microRNA AND frailty"	28
			Total 254
